# Supplementary material for: Drift Algal Accumulation in Ice Scour Pits Provides an Underestimated Ecological Subsidy in a Novel Antarctic Soft-Sediment Habitat
Source: MDPI journal article supplement (doi:10.3390/biology12010128), 2023-01-13
Supplement: s1 [file s1]

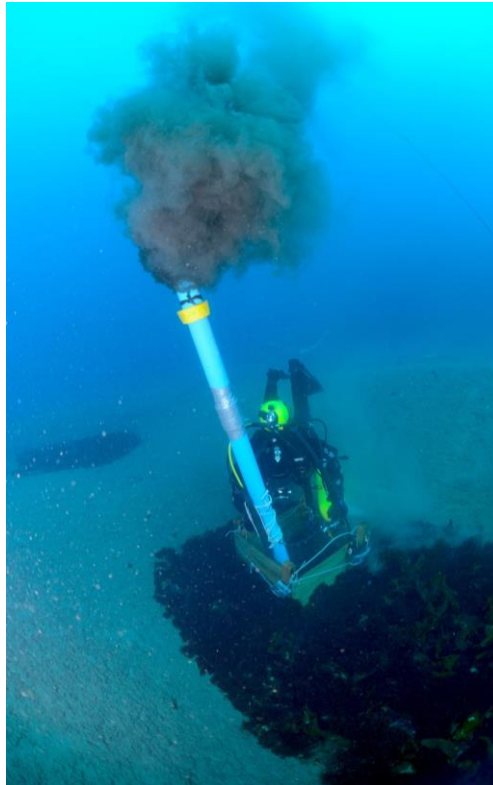

Figure S1: Suction sampling of 0.25-m<sup>2</sup> quadrat using an airlift device manipulated by a SCUBA diver.
